# Supplementary material
Source: Copernicus journal article supplement (doi:10.5194/egusphere-2025-57)

**A**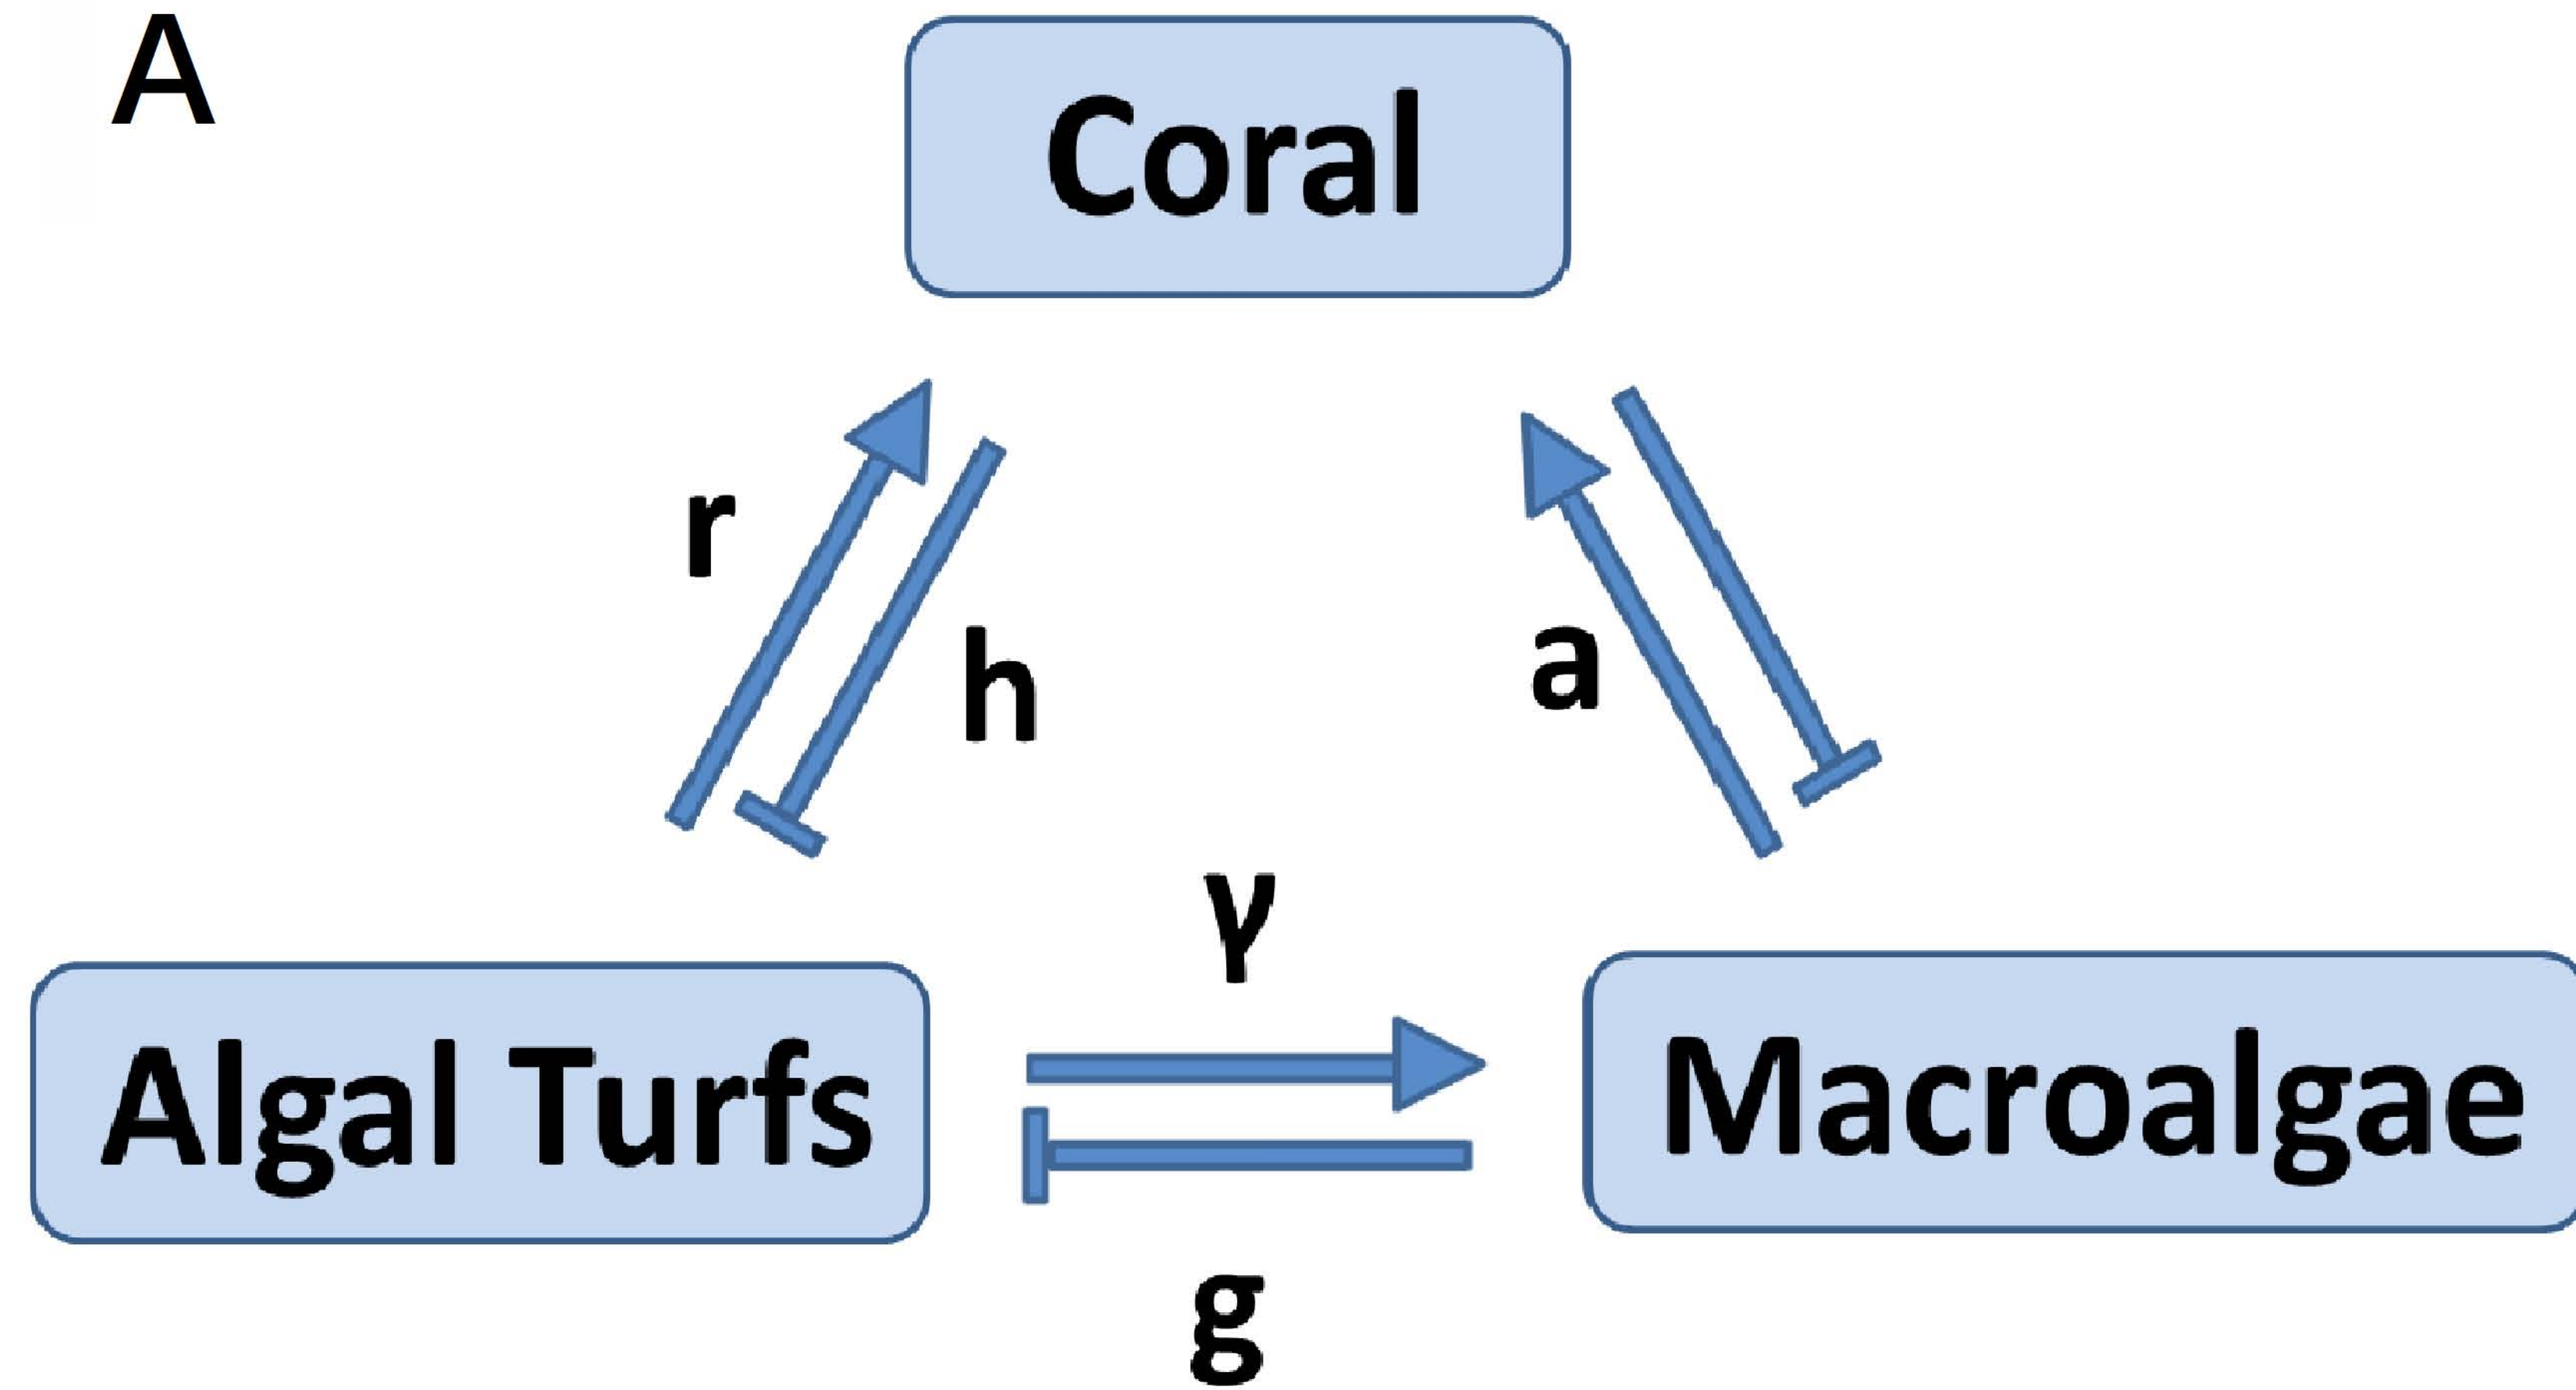**B**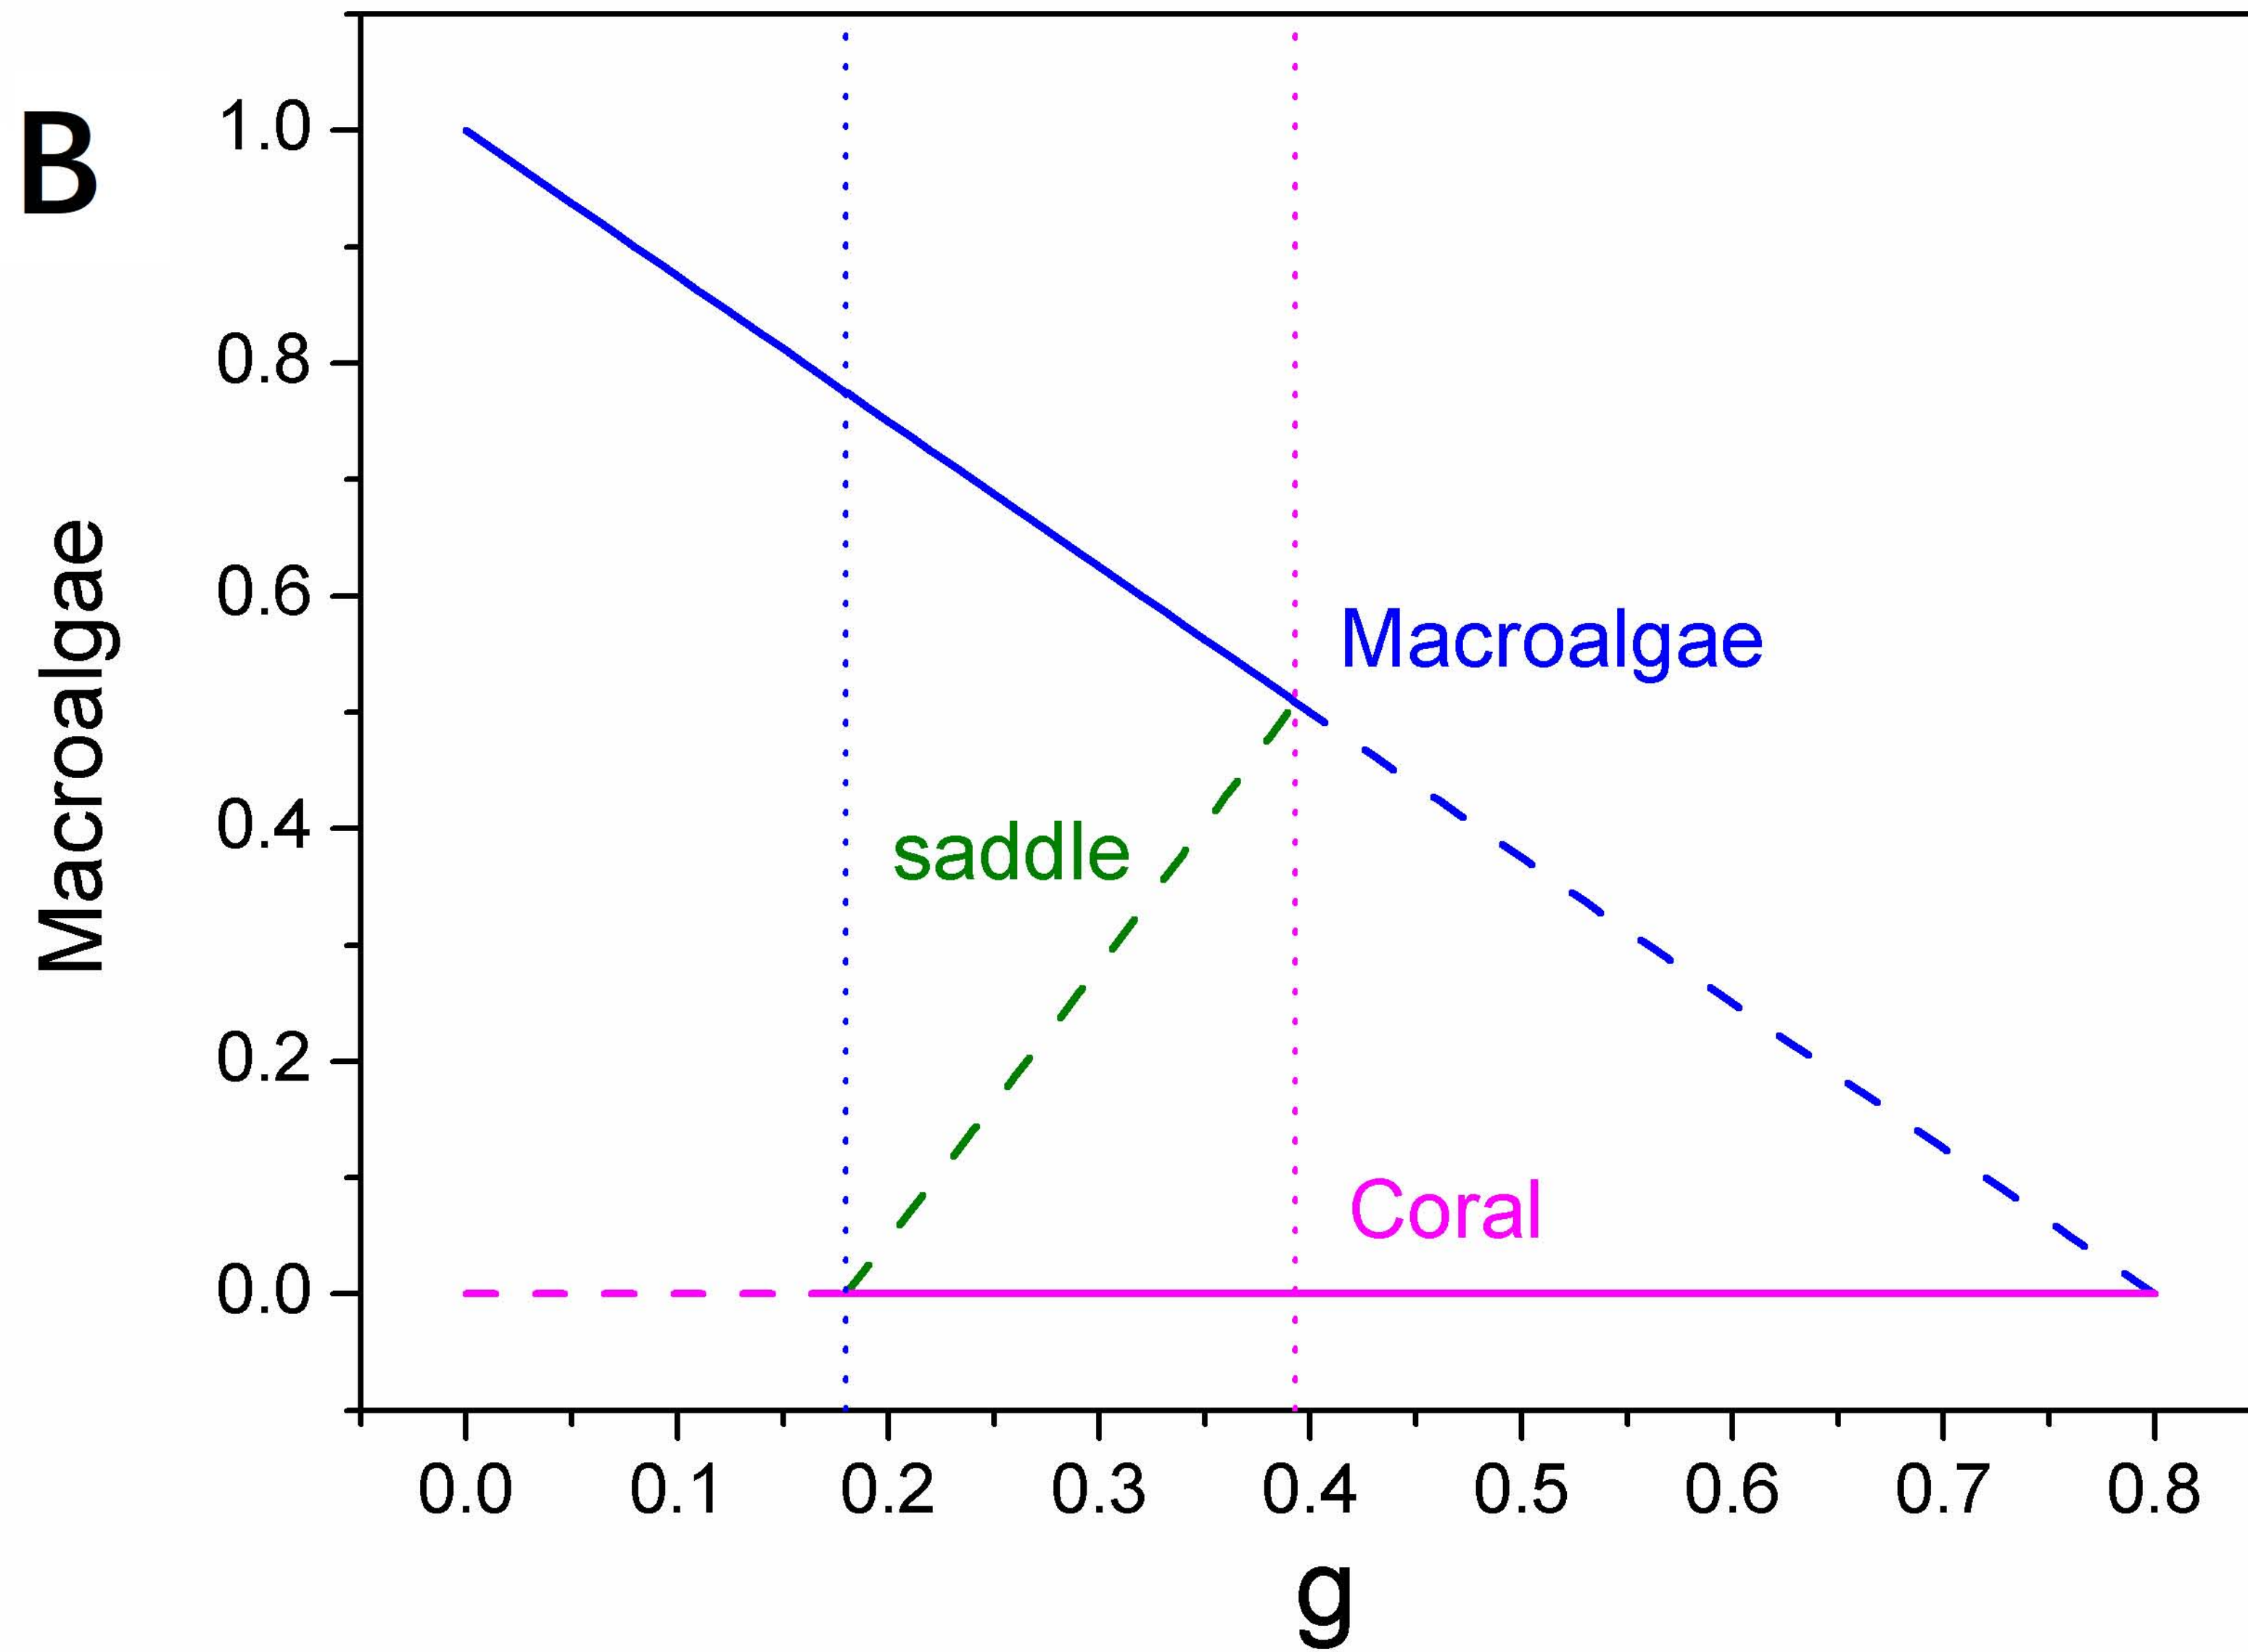

Supplement: Supplementary file [file fig1_sketch_phase1d.pdf › Figures and Tables/fig1_sketch_phase1d.pdf]
