# Supplementary material
Source: Copernicus journal article supplement (doi:10.5194/egusphere-2025-57)

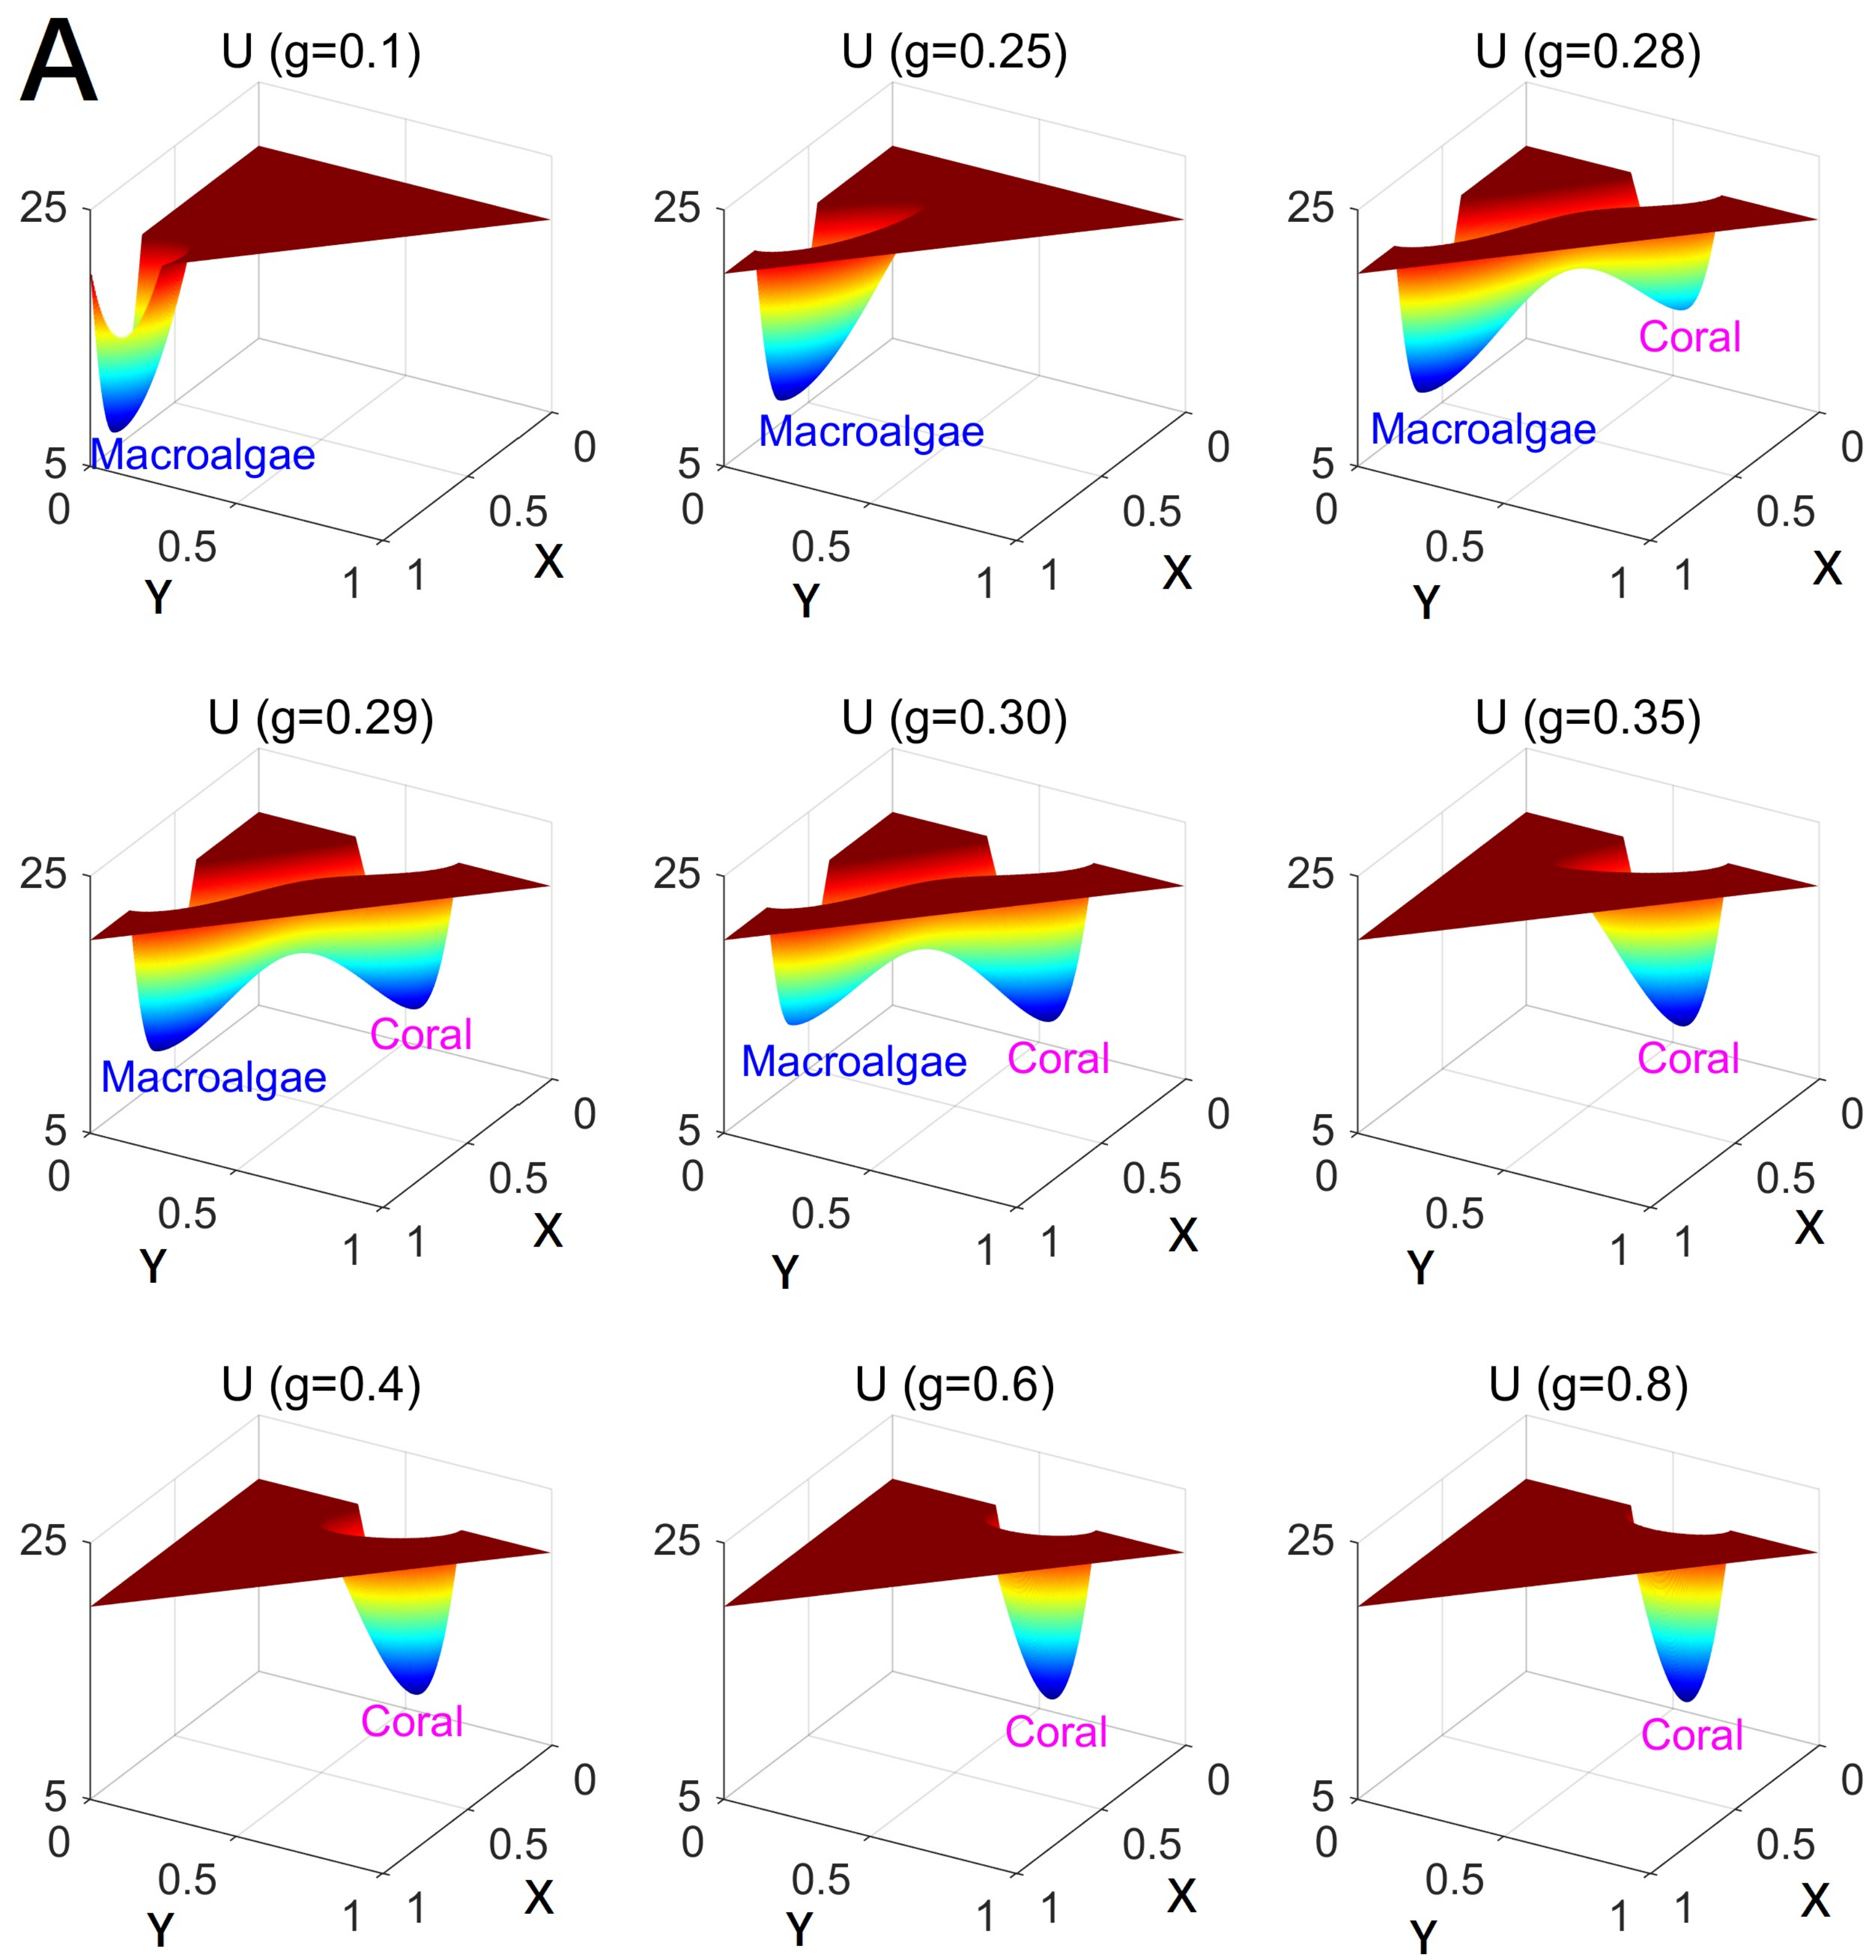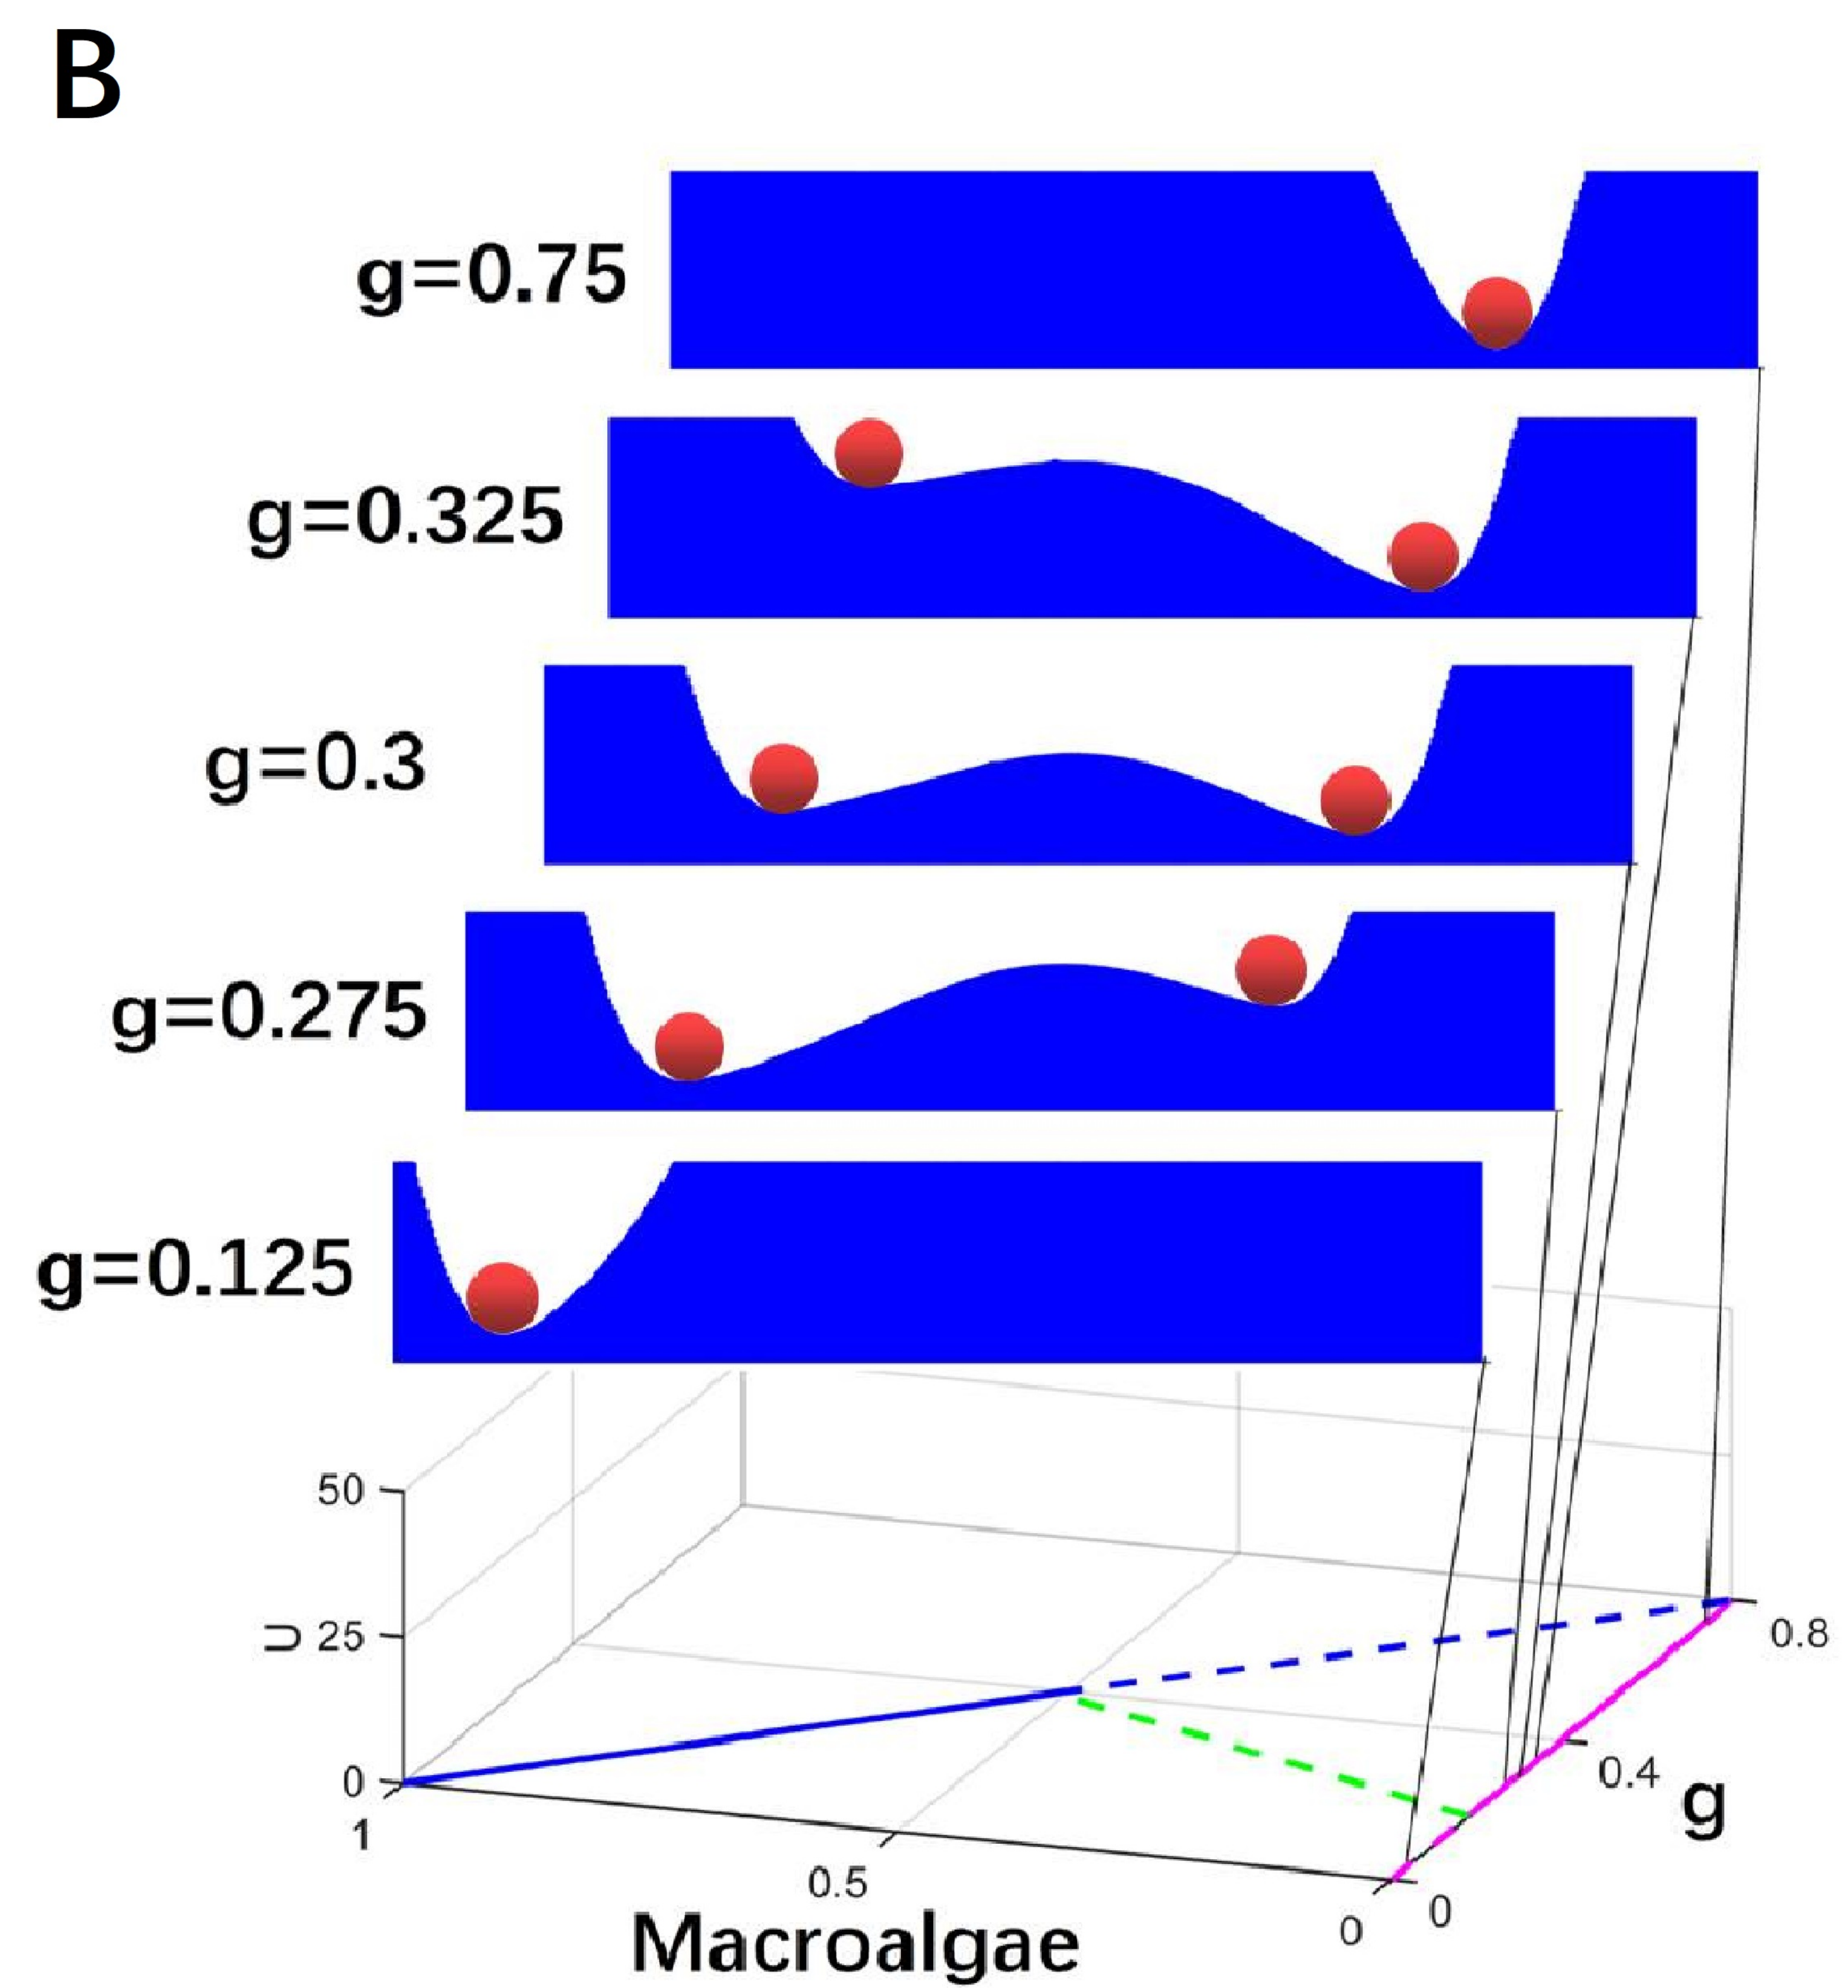

Supplement: Supplementary file [file fig2_U3d_U1d.pdf › Figures and Tables/fig2_U3d_U1d.pdf]
