# Supplementary material
Source: Copernicus journal article supplement (doi:10.5194/egusphere-2025-57)

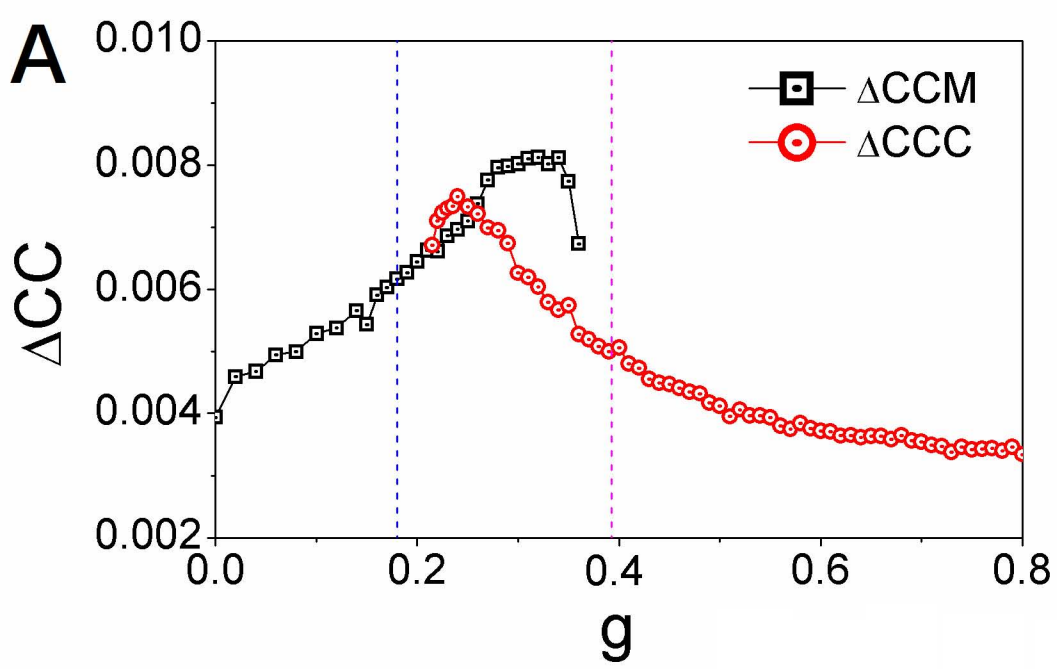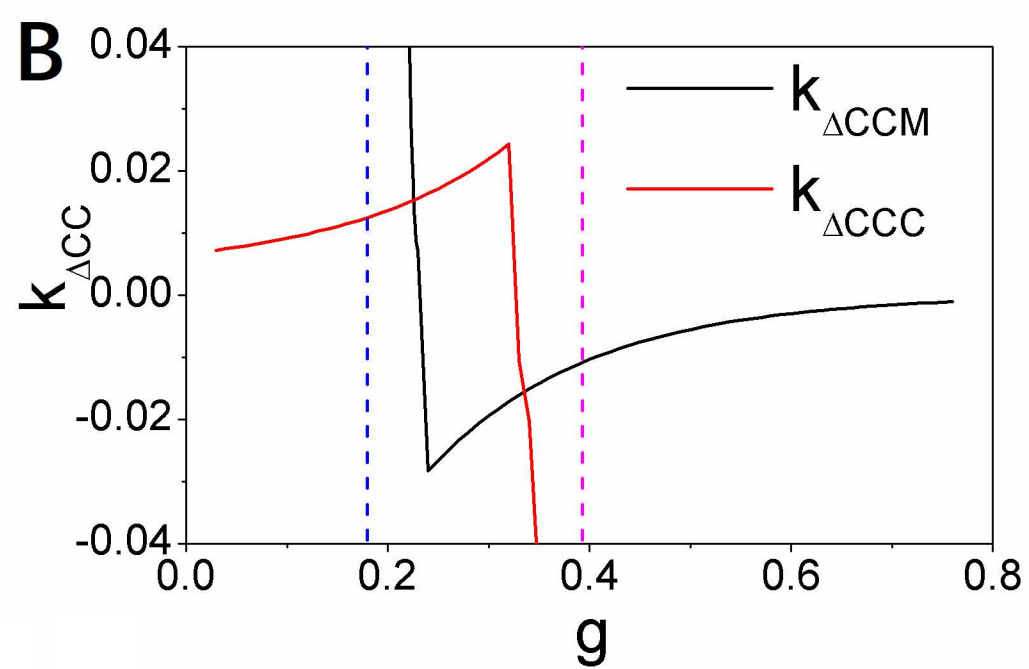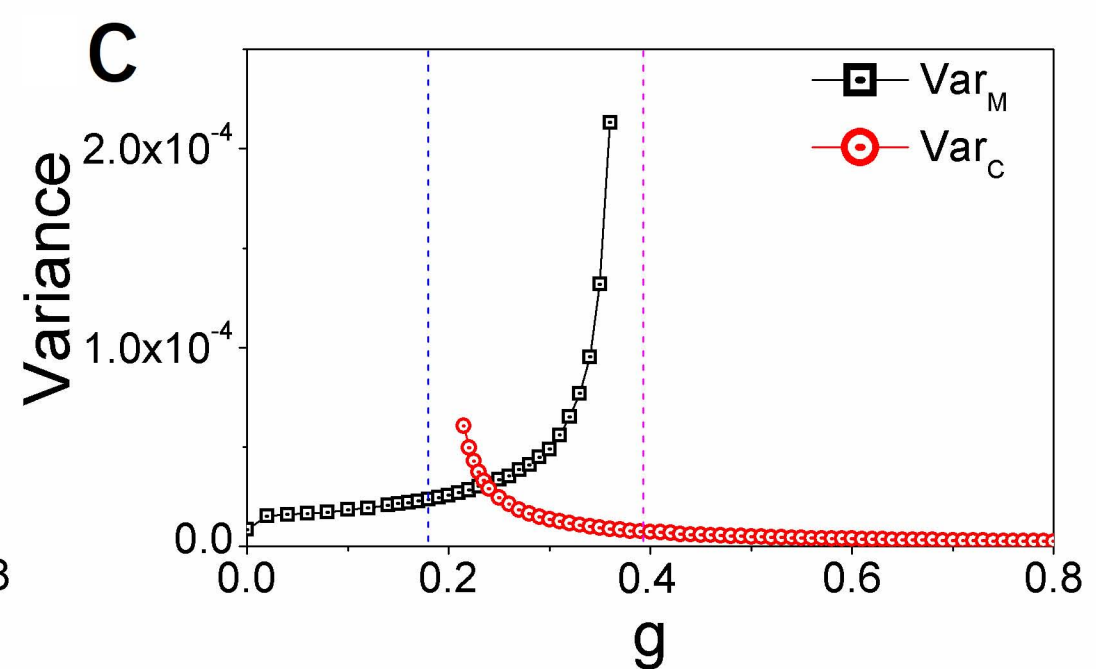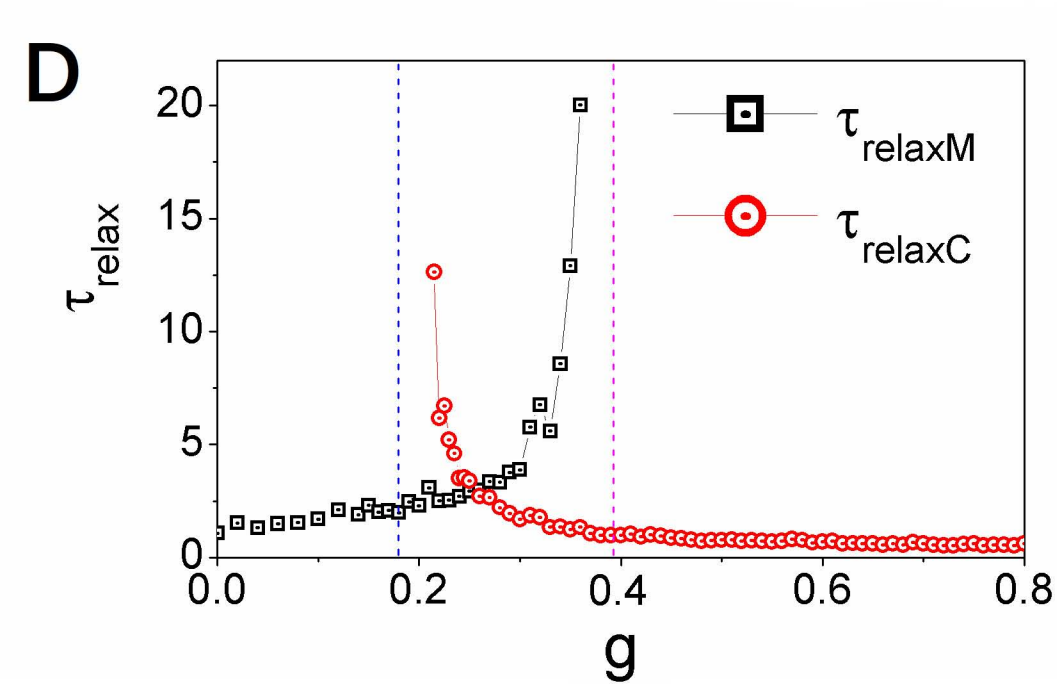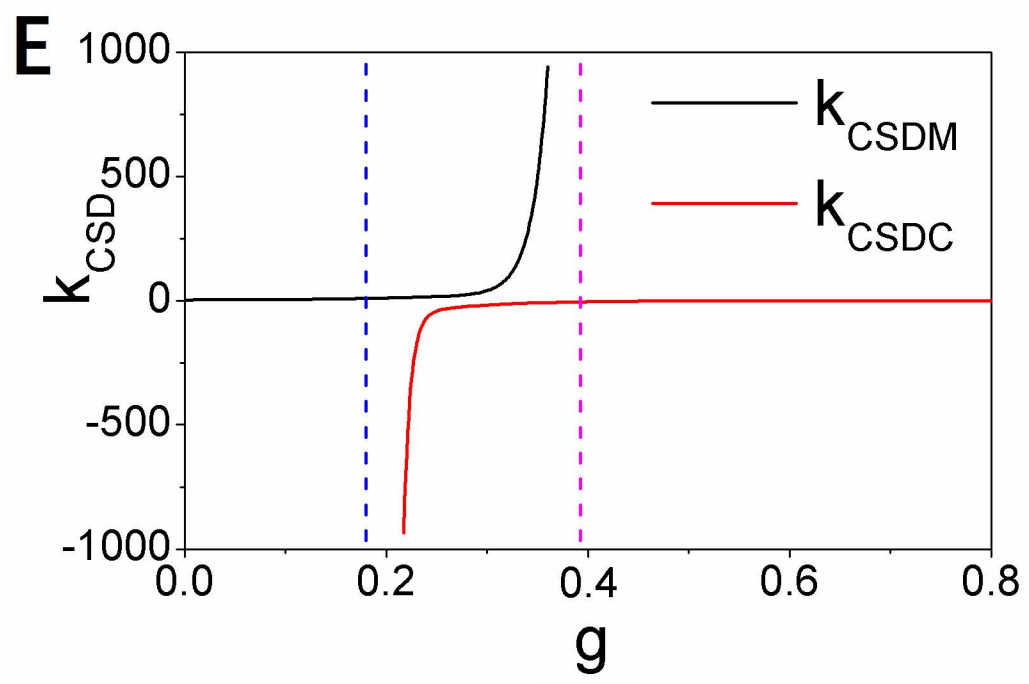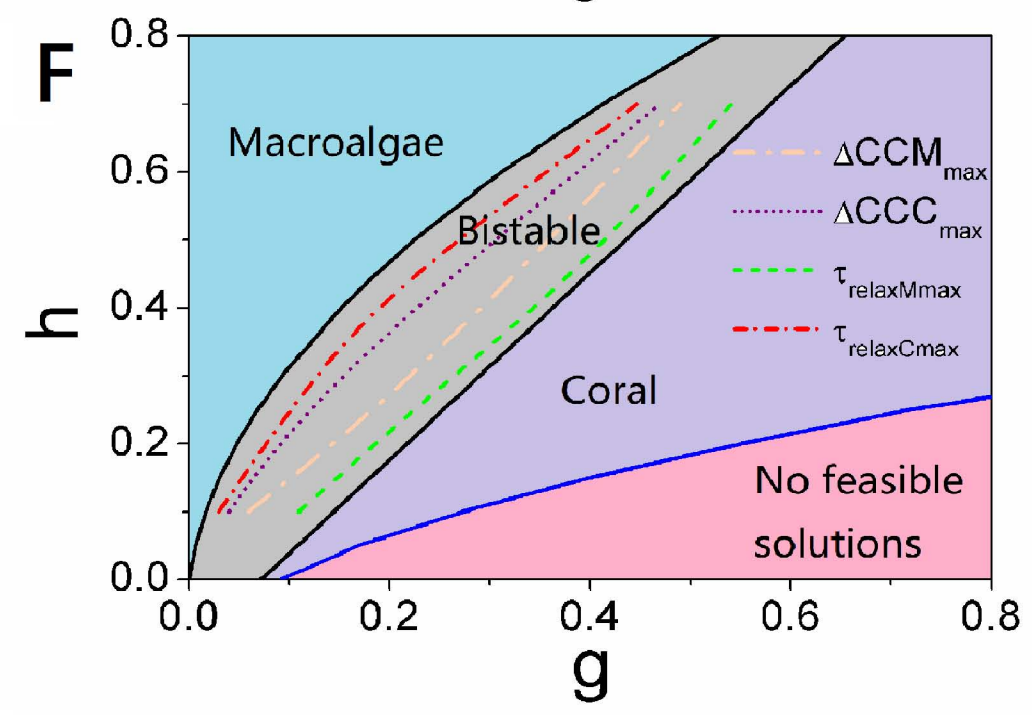

Supplement: Supplementary file [file fig5_corrh044_phase2d.pdf › Figures and Tables/fig5_corrh044_phase2d.pdf]
