# Supplementary material
Source: Copernicus journal article supplement (doi:10.5194/egusphere-2025-57)

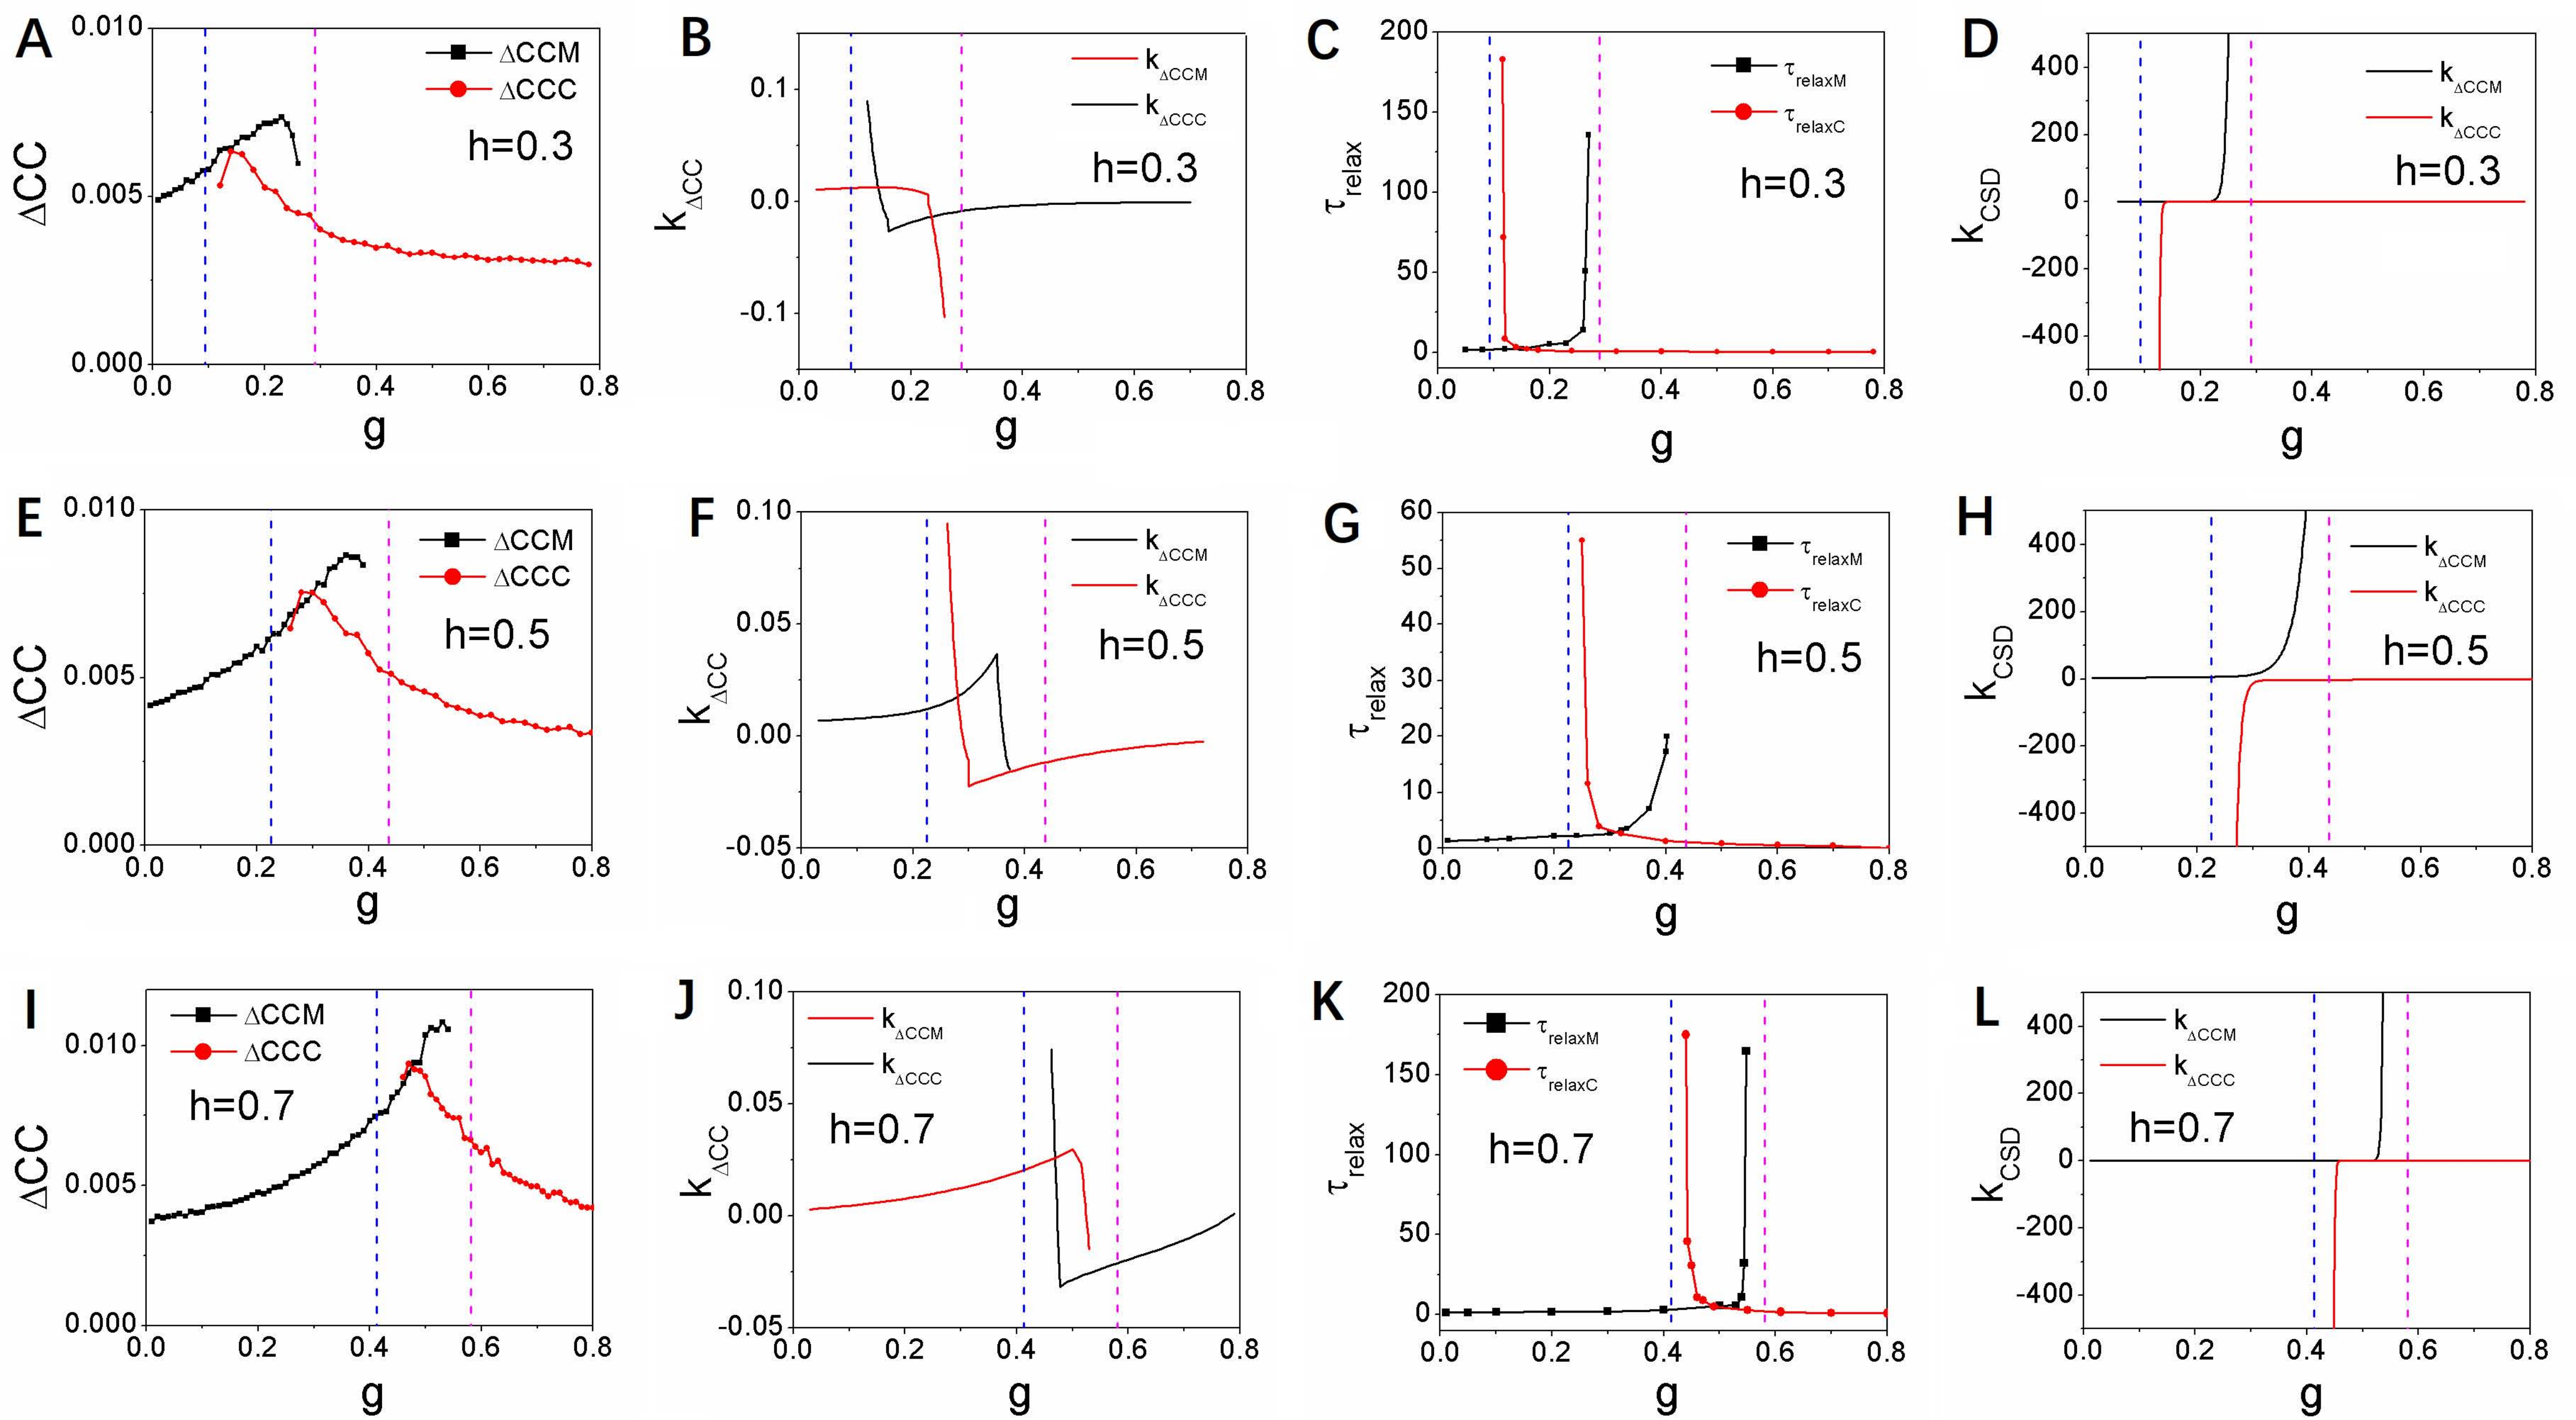

Supplement: Supplementary file [file figS2_CC_h.pdf › Figures and Tables/figS2_CC_h.pdf]
