# Supplementary material
Source: Copernicus journal article supplement (doi:10.5194/egusphere-2025-57)
Supplement: Supplementary file [file Table 1.pdf › Figures and Tables/Table 1.pdf]

| Symbol   | Ecological interpretation                                                                | Default value |
|----------|------------------------------------------------------------------------------------------|---------------|
| $a$      | the rate that corals are overgrown by macroalgae [ $year^{-1}$ ]                         | 0.1           |
| $\gamma$ | the rate that macroalgae spread vegetatively over algal turfs [ $year^{-1}$ ]            | 0.8           |
| $r$      | the rate that corals recruit to and overgrow algal turfs [ $year^{-1}$ ]                 | 1.0           |
| $h$      | the natural mortality rate of corals [ $year^{-1}$ ]                                     | 0.44          |
| $g$      | the rate at which herbivores consume macroalgae in the coral-algal model [ $year^{-1}$ ] |               |

**Table 1.** Parameters interpretation and default values(Mumby et al., 2007; Li et al., 2014)
