# Supplementary material
Source: Copernicus journal article supplement (doi:10.5194/egusphere-2025-57)
Supplement: Supplementary file [file Table S1.pdf › Figures and Tables/Table S1.pdf]

| Term                                         | Definition                                                                                                                                                                                         |
|----------------------------------------------|----------------------------------------------------------------------------------------------------------------------------------------------------------------------------------------------------|
| Attractor State                              | A stable configuration toward which a dynamical system tends to evolve regardless of starting conditions within its basin of attraction.                                                           |
| Basin of Attraction                          | The set of initial conditions from which a dynamical system evolves toward a particular attractor state.                                                                                           |
| Barrier height ( $\Delta U, \Delta \phi_0$ ) | energy required for a population to transit from one stable state to another in ecological or biological systems.                                                                                  |
| Bifurcation                                  | A qualitative change in system behavior that occurs when a small change in a parameter causes a sudden structural change in the system's dynamics.                                                 |
| Bistable Region                              | A parameter range where two stable states (attractors) coexist, allowing the system to settle in either state depending on initial conditions and perturbations.                                   |
| Critical Slowing Down (CSD)                  | The phenomenon where a system takes progressively longer to recover from perturbations as it approaches a bifurcation point, manifested as increasing relaxation time.                             |
| Cross-Correlation Function                   | A statistical measure of similarity between two time series as a function of the displacement of one relative to the other, used to quantify temporal relationships.                               |
| Curl Flux ( $J$ )                            | The rotational component of system dynamics that breaks detailed balance and drives non-equilibrium behavior, causing circulation in state space.                                                  |
| Detailed Balance                             | A condition in equilibrium systems where the probability flux between any two states is balanced, resulting in zero net circulation.                                                               |
| Diffusion Coefficient ( $D$ )                | A parameter quantifying the intensity of random fluctuations (noise) in a stochastic system.                                                                                                       |
| Dominant Path                                | The most probable trajectory a system follows when transitioning between stable states.                                                                                                            |
| Entropy Production Rate ( $EPR$ )            | A thermodynamic quantity measuring the rate at which a non-equilibrium system dissipates energy and generates entropy, quantifying the thermodynamic cost of maintaining non-equilibrium dynamics. |
| Frequency of the flickering ( $f_\omega$ )   | the number of transitions from one stable state to another stable state per unit time.                                                                                                             |
| Inflection Point                             | A point on a curve where the curvature changes sign, used to identify significant changes in system behavior.                                                                                      |
| Intrinsic Free Energy ( $\mathcal{F}$ )      | The free energy of a system calculated in the zero-noise limit, representing fundamental system energetics.                                                                                        |
| Intrinsic Potential Landscape ( $\phi_0$ )   | The potential landscape in the zero-noise limit that serves as a Lyapunov function for determining global stability.                                                                               |
| Landscape-Flux Theory                        | A theoretical framework for analyzing non-equilibrium systems by decomposing dynamics into gradient (landscape) and rotational (flux) components.                                                  |
| Langevin Equation                            | A stochastic differential equation describing the time evolution of a system subject to random forces.                                                                                             |
| Lyapunov Function                            | A scalar function that quantifies a system's stability, decreasing along trajectories and reaching minima at stable equilibria.                                                                    |
| Mean First Passage Time ( $MFPT, \tau$ )     | The average time required for a system to transition from one stable state to another, quantifying kinetic switching times between states.                                                         |
| Natural Mortality Rate of Coral ( $h$ )      | A parameter representing the intrinsic death rate of coral in the coral-algal model.                                                                                                               |
| Non-Equilibrium System                       | A system that does not satisfy detailed balance conditions and requires continuous energy input to maintain its state.                                                                             |
| Phase Diagram                                | A graphical representation showing different stable states and transition boundaries as functions of control parameters.                                                                           |
| Potential Landscape ( $U$ )                  | A mathematical function whose gradient determines the force driving a system toward stable states, analogous to an energy surface.                                                                 |
| Relaxation Time ( $\tau_{relax}$ )           | The characteristic time required for a system to return to equilibrium after a perturbation.                                                                                                       |
| Saddle Node Bifurcation                      | A bifurcation where a stable and an unstable fixed point collide and annihilate each other.                                                                                                        |
| Tipping Point                                | A critical threshold where a small change in a parameter causes a rapid, often irreversible transition to a qualitatively different system state.                                                  |
| Time Irreversibility ( $\Delta CC$ )         | A measure quantifying asymmetry between forward and backward processes in time, indicating non-equilibrium behavior and serving as an early warning signal.                                        |
| Transcritical Bifurcation                    | A bifurcation where two fixed points (one stable, one unstable) exchange stability as a parameter changes.                                                                                         |
